# Supplementary material for: Association between biological rhythm disturbances and suicidal ideation in mood disorders: A cross-sectional study in China
Source: Research Square preprint supplement (doi:10.21203/rs.3.rs-7414907/v1), 2025-09-09

# Supplementary Materials

## Supplementary Table S2.

Binary logistic regression results (main analysis, PHQ-9). Associations between depressive symptoms (measured by PHQ-9), biological rhythm disturbances, age at onset, and suicidal ideation are presented. Odds ratios (ORs), 95% confidence intervals (CIs), and p-values are shown.

| Predictor | OR | CI_lower | CI_upper | p-value |
| --- | --- | --- | --- | --- |
| Intercept | 0.006 | 0.001 | 0.044 | 0.000 |
| PHQ9_total | 1.214 | 1.099 | 1.340 | 0.000 |
| BRIAN_sleep | 1.239 | 1.084 | 1.417 | 0.002 |
| BRIAN_eating | 1.191 | 1.020 | 1.390 | 0.027 |
| Age | 0.969 | 0.941 | 0.998 | 0.036 |

## Supplementary Table S3.

Sensitivity analysis using PHQ-8 total score. Binary logistic regression analysis examining the association between depressive symptoms (measured by PHQ-8), biological rhythm disturbances, age at onset, and suicidal ideation. Odds ratios (ORs), 95% confidence intervals (CIs), and p-values are presented.

| Predictor | OR | CI_lower | CI_upper | p-value |
| --- | --- | --- | --- | --- |
| Intercept | 0.007 | 0.001 | 0.050 | 0.000 |
| PHQ_8 | 1.123 | 1.022 | 1.233 | 0.015 |
| BRIAN_sleep | 1.321 | 1.159 | 1.506 | 0.000 |
| BRIAN_eating | 1.242 | 1.070 | 1.441 | 0.004 |
| Age | 0.967 | 0.940 | 0.995 | 0.020 |

## Supplementary Table S4.

Sensitivity analysis using residualized depression score. Binary logistic regression analysis using a residualized depression score (PHQ-9 total regressed on item 9) instead of PHQ-9 total score.

| Predictor | OR | CI_lower | CI_upper | p-value |
| --- | --- | --- | --- | --- |
| Intercept | 0.001 | 0.000 | 0.013 | 0.000 |
| Residual_Depression | 0.805 | 0.721 | 0.900 | 0.000 |
| BRIAN_sleep | 1.598 | 1.380 | 1.851 | 0.000 |
| BRIAN_eating | 1.431 | 1.235 | 1.658 | 0.000 |
| Age | 0.962 | 0.935 | 0.990 | 0.009 |

## Supplementary Figure S1.

Odds ratios (95% confidence intervals) for key predictors of suicidal ideation across the main model (PHQ-9), sensitivity analysis using PHQ-8, and sensitivity analysis using residualized depression scores.


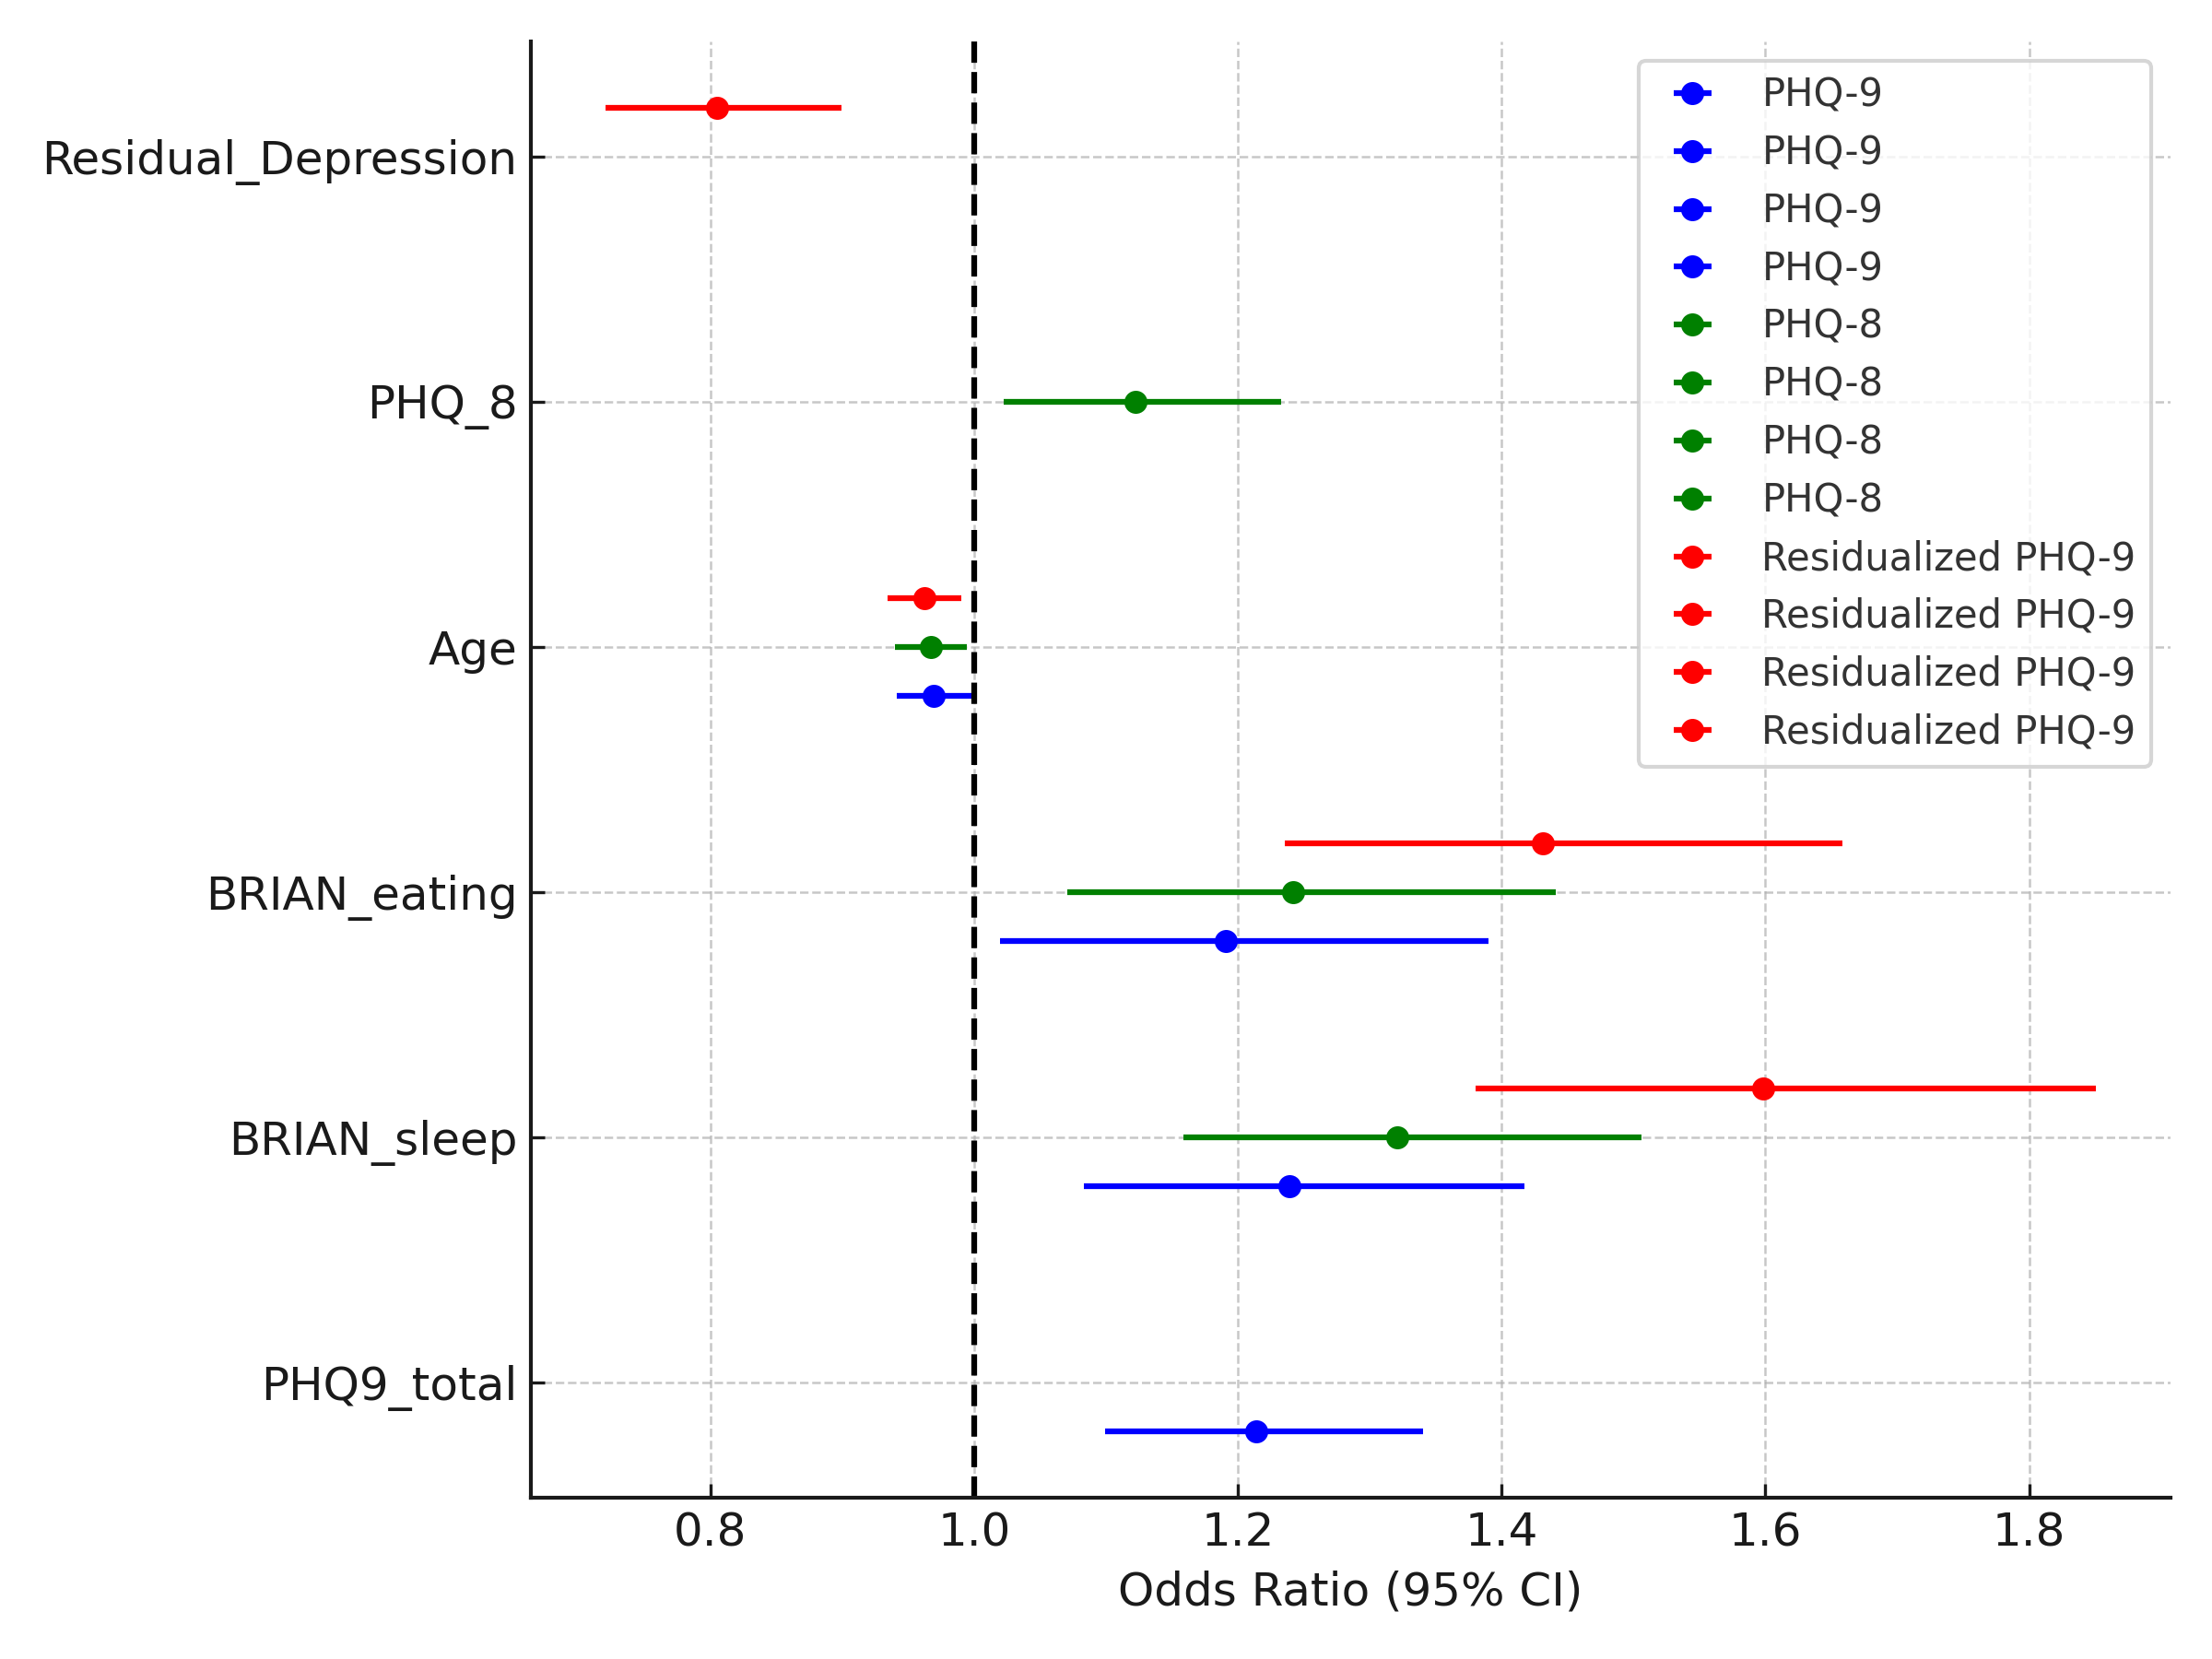

Supplement: Supplementary file 1 [file 2539d34bc4ab4b4e903c5501.docx]
