# Supplementary material for: Association between biological rhythm disturbances and suicidal ideation in mood disorders: A cross-sectional study in China
Source: Research Square preprint supplement (doi:10.21203/rs.3.rs-7414907/v1), 2025-09-09
Supplement: Supplementary file 2 [file 756c9c6dd56970f8c1d6ff91.xlsx]

## Sheet: Sheet1
The list of excluded illnesses：
1	Alzheimer's disease
2	Parkinson's disease
3	Epilepsy
4	Intracranial hemorrhages
5	Cerebral infarction
6	Trigeminal neuralgia
7	Coronary atherosclerotic heart disease
8	Hypertension
9	Bronchial asthma
10	Chronic bronchitis
11	Pneumonia
12	Lung cancer
13	Pulmonary tuberculosis
14	Chronic gastritis
15	Fatty liver disease
16	Peptic ulcer
17	Liver cirrhosis
18	Drug induced liver injury
19	Cholecystolithiasis
20	Urinary tract infection
21	Chronic glomerulonephritis
22	Nephrotic syndrome
23	Leukemia
24	Anemia
25	Lymphoma
26	Cushing syndrome
27	Hypothyroidism
28	Hyperthyroidism
29	Diabetes mellitus
30	Pheochromocytoma
31	Chronic adrenocortical hypofunction
32	Systemic lupus erythematosus
33	Primary Sjogren syndrome
34	Recently affected by trauma, bone fractures, or those who have undergone surgery.
35	Oncological conditions
36	Chronic pain
37	Pruritus
38	Infectious diseases ( HIV, syphilis, tuberculosis, hepatitis B, hepatitis C, covid 19.)
