# Supplementary material for: Association between biological rhythm disturbances and suicidal ideation in mood disorders: A cross-sectional study in China
Source: Research Square preprint supplement (doi:10.21203/rs.3.rs-7414907/v1), 2025-09-09
Supplement: Supplementary file 3 [file 88586a388fa0ba8177cace12.xlsx]

## Sheet: Sheet1
ID	Age	Gender	Diagnosis	PHQ9_total	PHQ9_item9	PHQ-8	BRIAN_sleep	BRIAN_activity	BRIAN_social	BRIAN_eating	BRIAN total	GAD-7	ASRM	Suicidal_Ideation	Years of education	Ethnicity, Han	Married	Employment status	Age at onset	-1*Age at onset	Currently on Medication	Mood Stabilizers Usage	Antipsychotic Usage	Antidepressant Usage	Sedative/Anxiolytic Usage	Psychotherapy	Physical Therapy	Excessive screen time
1	20	2	2	27	3	24	10	20	16	10	56	18	0	1	11	2	0	1	16	-16	1	1	1	1	0	1	1	1
2	26	2	1	26	3	23	20	18	10	14	62	18	3	1	11	2	0	1	15	-15	0	0	0	0	0	0	0	1
3	31	2	3	25	3	22	13	20	13	13	59	11	3	1	9	2	1	0	26	-26	1	1	1	1	1	0	0	0
4	24	2	1	25	3	22	18	19	13	15	65	18	5	1	9	1	0	1	10	-10	1	0	1	1	0	0	0	0
5	22	1	2	25	3	22	16	17	11	5	49	14	1	1	15	1	0	1	18	-18	1	1	1	1	0	0	1	1
6	20	1	3	24	1	23	17	17	14	13	61	21	4	1	9	1	0	1	18	-18	1	0	1	1	1	0	0	0
7	20	2	2	24	3	21	18	20	12	16	66	20	5	1	9	1	0	1	14	-14	1	1	1	1	0	0	0	0
8	20	2	1	24	3	21	14	15	11	5	45	20	5	1	12	1	0	1	15	-15	1	0	1	1	0	0	1	1
9	40	1	3	15	0	15	10	12	11	9	42	18	4	0	9	1	1	1	38	-38	1	1	1	1	1	0	0	0
10	20	2	3	23	3	20	19	12	12	12	55	12	1	1	14	1	0	1	19	-19	1	0	0	1	1	1	1	0
11	57	2	3	23	2	21	17	20	13	14	64	3	3	1	11	1	1	0	56	-56	1	0	0	1	1	0	0	0
12	27	2	3	23	1	22	19	15	15	11	60	21	5	1	9	1	0	1	14	-14	1	0	1	1	0	0	0	0
13	28	2	3	23	3	20	17	14	15	15	61	19	4	1	10	1	0	1	28	-28	0	0	0	0	0	0	0	1
14	24	2	3	23	3	20	16	14	7	9	46	18	5	1	9	2	0	1	12	-12	1	0	0	1	0	0	0	1
15	22	2	1	23	3	20	13	10	9	12	44	10	2	1	10	2	0	1	10	-10	1	1	1	1	0	0	0	1
16	39	2	2	23	3	20	12	13	11	11	47	18	2	1	11	2	0	1	15	-15	1	1	1	0	0	0	0	1
17	43	2	2	23	1	22	13	17	15	6	51	19	0	1	16	2	1	1	39	-39	1	1	1	0	0	0	0	1
18	26	2	1	23	3	20	17	17	13	13	60	15	5	1	9	1	0	1	12	-12	0	0	0	0	0	0	0	1
19	19	2	1	23	3	20	18	14	12	14	58	21	5	1	15	1	0	1	14	-14	1	1	1	0	0	0	0	0
20	26	2	1	23	3	20	16	15	11	14	56	16	2	1	9	1	0	1	13	-13	1	1	1	0	0	0	0	0
21	28	2	2	23	2	21	20	15	13	16	64	21	5	1	10	1	0	1	28	-28	0	0	0	0	0	0	0	1
22	25	2	3	22	2	20	14	15	10	14	53	15	3	1	16	1	1	1	25	-25	1	0	0	1	1	0	0	0
23	36	1	3	22	2	20	14	17	16	11	58	17	2	1	12	1	1	1	35	-35	1	0	1	1	1	0	0	0
24	36	1	3	22	2	20	12	12	13	13	50	21	0	1	9	2	1	0	36	-36	1	0	0	1	0	0	0	1
25	20	2	3	22	3	19	17	16	9	12	54	9	0	1	12	1	0	1	16	-16	0	0	0	0	0	0	0	0
26	26	1	3	22	2	20	17	14	10	10	51	13	2	1	9	1	0	1	12	-12	0	0	0	0	0	0	0	0
27	18	1	3	22	2	20	16	14	11	11	52	12	0	1	12	1	0	1	17	-17	1	1	1	1	1	0	1	0
28	38	2	1	22	3	19	15	15	13	12	55	18	5	1	9	1	1	1	38	-38	1	1	1	1	0	0	0	1
29	28	1	2	22	3	19	19	16	8	8	51	16	0	1	19	1	0	1	15	-15	1	1	1	1	0	0	0	0
30	25	2	1	22	1	21	16	15	13	13	57	13	5	1	12	1	0	1	13	-13	1	0	0	1	1	0	0	1
31	22	1	2	22	2	20	19	14	15	13	61	20	4	1	15	2	0	1	16	-16	1	1	1	0	1	0	0	1
32	29	1	1	22	2	20	15	17	9	13	54	17	4	1	9	2	0	1	29	-29	0	0	0	0	0	0	0	0
33	21	2	1	22	3	19	17	14	13	12	56	15	5	1	14	1	0	1	19	-19	1	1	1	0	0	0	0	1
34	29	1	1	22	2	20	20	12	10	11	53	13	0	1	8	1	0	1	11	-11	1	1	1	1	0	0	0	0
36	23	2	3	21	1	20	17	18	10	13	58	19	3	1	17	1	0	0	23	-23	1	0	0	1	1	1	0	0
37	20	2	3	21	2	19	13	12	10	14	49	17	4	1	9	2	0	1	11	-11	0	0	0	0	0	0	0	1
38	21	2	3	21	2	19	13	12	8	9	42	16	2	1	8	2	0	1	13	-13	1	1	1	1	0	1	1	0
39	38	2	3	21	2	19	16	15	8	10	49	14	1	1	9	1	1	1	35	-35	1	1	1	1	1	1	1	0
40	18	1	3	21	2	19	14	14	11	7	46	15	2	1	9	1	0	1	18	-18	1	1	1	1	1	0	1	1
41	33	2	3	21	1	20	13	13	6	10	42	20	5	1	9	2	1	0	30	-30	1	0	1	1	1	0	1	0
42	42	2	3	21	3	18	18	19	13	14	64	12	0	1	16	1	1	1	42	-42	1	0	0	1	1	0	0	0
43	26	2	3	21	1	20	18	15	10	8	51	7	3	1	11	1	1	1	12	-12	1	0	1	1	0	0	1	0
44	25	2	3	21	2	19	19	10	8	8	45	19	1	1	9	1	1	1	12	-12	0	0	0	0	0	0	0	0
45	18	1	3	21	3	18	16	17	14	10	57	15	0	1	12	1	0	1	16	-16	1	0	0	1	0	0	0	0
46	25	2	3	21	3	18	20	18	12	9	59	19	0	1	16	1	1	1	22	-22	1	0	0	1	1	0	0	1
47	34	2	1	21	2	19	12	10	9	12	43	14	0	1	15	2	0	1	33	-33	1	1	1	0	0	0	0	1
48	20	2	1	21	1	20	17	14	11	12	54	18	5	1	11	1	0	1	12	-12	1	1	1	1	1	0	0	0
50	23	2	3	20	3	17	17	10	13	14	54	16	0	1	15	1	0	1	21	-21	0	0	0	0	0	0	0	0
51	27	1	3	20	0	20	15	16	11	7	49	11	1	0	16	1	0	1	25	-25	1	0	0	1	1	0	0	0
52	57	2	3	20	3	17	14	17	13	11	55	21	4	1	15	1	1	1	57	-57	1	0	0	1	1	0	0	1
53	18	2	3	20	1	19	11	15	10	11	47	15	0	1	12	2	0	0	14	-14	1	0	1	1	0	0	0	0
54	31	1	3	20	1	19	13	11	11	12	47	19	1	1	11	2	1	1	31	-31	1	0	1	1	0	0	1	0
55	19	2	3	20	3	17	11	11	7	15	44	16	2	1	7	2	0	1	13	-13	1	0	0	1	1	0	1	1
56	30	2	2	20	3	17	12	10	8	11	41	10	2	1	16	2	0	1	15	-15	1	1	1	1	1	0	1	0
57	31	2	2	20	2	18	18	17	8	15	58	16	1	1	16	1	1	1	27	-27	1	1	1	0	1	0	0	1
59	19	2	1	20	3	17	15	14	6	6	41	13	5	1	19	1	0	1	13	-13	0	0	0	0	0	0	0	0
60	21	2	2	20	2	18	11	10	8	15	44	11	5	1	11	2	0	1	12	-12	1	1	1	1	0	0	0	0
61	21	2	1	20	2	18	13	11	8	6	38	17	5	1	6	2	0	1	12	-12	1	1	1	1	1	0	1	1
62	20	2	3	19	3	16	15	13	12	13	53	10	2	1	16	1	0	1	14	-14	1	0	0	1	0	1	0	1
63	32	2	3	19	1	18	15	15	11	10	51	19	0	1	15	1	1	1	32	-32	1	0	0	1	0	1	0	1
64	19	2	3	19	2	17	11	15	10	10	46	0	5	1	10	2	0	0	14	-14	1	0	0	1	1	1	0	1
65	19	2	3	19	3	16	13	10	11	9	43	10	3	1	13	2	0	1	14	-14	1	1	1	1	1	1	0	0
66	20	2	3	19	2	17	14	16	13	12	55	12	2	1	8	1	0	1	16	-16	1	0	1	1	0	0	0	0
67	20	2	3	19	1	18	15	17	13	10	55	14	1	1	10	2	0	1	16	-16	0	0	0	0	0	0	0	0
68	29	2	3	19	1	18	15	15	11	10	51	11	2	1	16	1	1	0	22	-22	1	0	0	1	1	0	1	0
69	18	2	2	19	2	17	14	14	6	9	43	15	2	1	12	1	0	1	13	-13	1	1	1	1	0	0	0	0
70	26	2	1	19	3	16	16	17	11	14	58	13	5	1	12	1	0	0	14	-14	1	1	1	1	1	1	0	0
71	22	2	3	18	3	15	14	8	11	10	43	12	3	1	15	1	0	1	22	-22	0	0	0	0	0	0	0	0
72	20	2	3	18	1	17	15	15	10	8	48	14	0	1	16	1	0	1	18	-18	0	0	0	0	0	0	0	1
73	52	2	3	18	1	17	17	11	8	11	47	17	3	1	7	1	1	0	52	-52	1	0	1	1	1	0	0	0
74	33	2	3	18	2	16	14	17	15	9	55	14	0	1	7	1	0	1	11	-11	1	0	1	1	0	0	0	0
75	20	2	3	18	2	16	19	17	10	11	57	20	0	1	15	1	0	1	18	-18	0	0	0	0	0	0	0	0
76	32	2	3	18	1	17	15	17	8	4	44	0	1	1	15	1	1	1	30	-30	1	1	1	1	0	1	1	0
77	40	2	3	18	1	17	14	17	14	12	57	19	2	1	16	1	1	0	35	-35	1	0	0	1	1	0	0	0
78	18	2	3	18	2	16	12	16	9	10	47	17	5	1	11	2	0	1	18	-18	0	0	0	0	0	0	0	1
79	24	1	2	18	2	16	16	8	10	13	47	8	4	1	16	1	0	0	23	-23	1	1	0	0	1	0	0	1
80	31	2	2	18	3	15	16	15	12	11	54	12	2	1	16	1	1	1	18	-18	1	1	1	0	1	0	0	0
81	37	1	1	18	1	17	11	8	9	10	38	13	0	1	15	2	1	0	33	-33	1	1	1	0	1	1	0	0
82	48	2	2	18	0	18	11	8	10	10	39	7	5	0	15	1	1	1	48	-48	1	1	1	0	0	0	0	1
83	22	2	1	18	3	15	14	15	12	7	48	8	1	1	11	1	0	1	13	-13	1	1	1	1	1	0	0	1
84	22	2	2	18	2	16	19	16	11	14	60	11	2	1	10	1	0	1	13	-13	1	1	1	0	0	0	0	0
85	23	2	2	18	1	17	14	8	8	10	40	11	2	1	9	1	0	1	13	-13	1	1	0	1	0	0	0	0
86	25	1	2	18	3	15	17	13	14	10	54	14	0	1	15	1	0	1	12	-12	1	1	1	1	0	0	0	0
87	27	1	3	17	1	16	10	12	10	10	42	17	1	1	12	2	1	0	23	-23	1	0	0	1	1	0	0	1
88	52	2	3	17	2	15	15	14	10	13	52	15	5	1	16	1	1	1	48	-48	1	0	0	1	0	0	0	0
89	34	2	3	17	3	14	14	7	7	12	40	6	5	1	11	2	1	1	13	-13	1	1	1	1	0	1	0	1
90	18	2	3	17	1	16	15	12	5	9	41	11	0	1	10	1	0	1	17	-17	1	0	0	1	0	0	0	0
91	18	2	3	17	3	14	12	5	4	9	30	9	2	1	11	2	0	1	16	-16	1	1	0	1	0	0	0	0
92	28	2	3	17	3	14	16	13	11	11	51	15	4	1	9	1	0	1	10	-10	1	0	1	1	0	1	0	0
93	19	1	3	17	2	15	16	15	12	8	51	17	1	1	12	1	0	1	17	-17	1	0	1	1	1	0	0	1
94	28	2	3	17	2	15	22	14	9	13	58	15	1	1	11	1	0	1	14	-14	0	0	0	0	0	0	0	1
95	20	2	3	17	1	16	18	11	15	13	57	15	5	1	11	1	0	1	14	-14	1	1	1	0	0	0	0	0
96	35	2	3	17	2	15	13	10	11	11	45	13	0	1	10	2	1	1	14	-14	1	0	1	1	1	0	1	0
97	35	2	2	17	1	16	17	14	12	11	54	18	1	1	9	1	1	1	13	-13	1	1	1	1	1	0	0	0
98	36	2	1	17	0	17	12	14	13	10	49	11	0	0	16	1	1	1	33	-33	1	1	1	0	0	0	0	1
99	31	1	1	17	1	16	11	20	13	11	55	20	0	1	12	2	0	0	18	-18	1	1	1	0	0	0	0	0
100	31	2	2	17	1	16	11	17	13	12	53	13	0	1	16	2	1	1	28	-28	1	1	1	0	1	0	0	1
101	60	2	1	17	0	17	14	19	11	7	51	10	2	0	15	1	1	0	46	-46	1	1	1	1	1	0	0	0
102	27	2	1	17	2	15	19	16	16	13	64	21	5	1	16	1	0	1	17	-17	1	1	1	1	0	0	0	1
103	26	1	1	17	0	17	13	13	7	12	45	11	4	0	9	1	0	0	26	-26	1	1	1	0	1	1	0	0
104	30	2	1	17	2	15	10	5	8	12	35	10	3	1	15	2	1	1	30	-30	1	1	1	1	0	0	1	1
105	36	2	1	17	2	15	14	8	7	5	34	14	4	1	20	2	1	0	35	-35	1	1	1	1	0	0	1	0
106	27	2	3	16	0	16	13	9	9	9	40	9	2	0	9	1	1	1	27	-27	1	0	0	1	1	0	0	1
107	27	2	3	16	1	15	13	12	6	13	44	8	1	1	11	2	0	1	12	-12	1	1	1	1	0	0	1	0
108	35	1	3	16	0	16	10	15	12	6	43	5	1	0	9	1	1	1	26	-26	1	1	1	1	0	0	1	0
109	41	2	3	16	1	15	12	17	6	8	43	14	1	1	9	2	1	0	30	-30	1	0	0	1	0	0	0	0
110	34	1	1	16	1	15	12	17	6	8	43	14	5	1	10	2	0	1	16	-16	1	1	1	1	1	1	1	1
111	31	1	2	16	2	14	12	11	8	6	37	8	2	1	10	2	0	1	15	-15	1	1	1	0	0	0	0	1
112	18	2	1	16	1	15	12	11	9	13	45	11	0	1	7	2	0	1	11	-11	1	1	1	1	0	1	0	0
113	46	2	1	16	2	14	16	15	12	9	52	10	5	1	12	1	1	1	13	-13	1	1	1	0	1	1	0	0
114	32	2	1	16	0	16	17	19	9	4	49	17	2	0	16	1	0	1	30	-30	1	0	1	1	0	1	0	1
115	33	2	2	16	2	14	16	11	8	10	45	10	3	1	11	1	0	0	13	-13	0	0	0	0	0	0	0	0
116	26	2	1	16	1	15	11	7	9	7	34	16	5	1	9	2	1	1	20	-20	1	1	1	0	0	1	0	0
117	18	2	1	16	1	15	11	15	10	5	41	13	2	1	11	2	0	1	18	-18	0	0	0	0	0	1	0	0
119	40	2	3	15	0	15	16	17	12	10	55	9	5	0	9	1	1	0	35	-35	1	0	0	1	1	0	0	0
120	23	2	3	15	1	14	15	12	9	9	45	20	2	1	6	1	0	1	21	-21	1	0	1	1	1	0	0	0
121	45	2	3	15	1	14	16	19	11	8	54	0	3	1	17	1	1	0	45	-45	0	0	0	0	0	0	0	0
122	25	1	3	15	1	14	10	18	8	8	43	0	0	1	9	2	1	0	25	-25	1	0	1	1	1	0	0	0
123	28	2	3	15	1	14	19	16	10	12	57	16	4	1	7	1	0	1	12	-12	1	0	0	1	1	0	0	1
124	27	2	3	15	1	14	12	11	7	14	44	13	4	1	10	2	0	1	16	-16	1	1	1	1	1	0	0	1
125	23	1	2	15	0	15	11	16	10	7	44	13	1	0	16	1	0	1	20	-20	1	1	0	1	1	0	0	1
126	24	1	2	15	1	14	12	6	8	9	35	13	4	1	16	2	0	0	23	-23	1	0	0	0	1	0	0	0
127	33	1	1	15	1	14	7	9	10	7	33	14	1	1	8	2	1	1	14	-14	1	1	1	0	1	0	0	1
128	28	1	1	15	0	15	8	15	10	7	40	14	3	0	11	1	1	1	28	-28	1	1	1	0	1	1	0	0
129	37	1	1	15	0	15	16	13	7	7	43	18	1	0	9	1	1	1	14	-14	1	1	1	0	1	1	1	1
130	34	1	1	15	1	14	12	16	13	11	52	9	1	1	9	2	1	1	22	-22	1	1	1	1	0	0	1	1
131	28	2	1	15	1	14	16	13	9	11	49	17	5	1	9	1	0	1	13	-13	1	1	0	1	0	0	0	0
132	32	1	1	15	1	14	11	10	8	8	37	2	5	1	12	2	0	0	22	-22	1	1	1	1	0	0	0	0
133	19	2	2	15	1	14	10	12	10	10	42	20	5	1	9	2	0	0	19	-19	1	1	1	0	0	0	0	1
134	21	2	1	15	2	13	15	12	12	8	47	10	3	1	15	1	0	1	17	-17	1	1	1	0	0	0	0	1
135	28	2	3	14	1	13	14	6	8	5	33	11	0	1	18	2	0	1	20	-20	1	0	0	1	0	0	0	0
136	56	2	3	14	1	13	9	7	11	8	35	13	1	1	12	2	1	0	56	-56	1	0	0	1	1	0	0	0
137	20	2	3	14	1	13	16	11	9	10	46	14	5	1	9	1	0	1	13	-13	1	1	1	1	1	0	0	0
138	38	1	3	14	1	13	13	18	13	10	54	11	1	1	20	2	1	1	38	-38	0	0	0	0	0	0	0	0
139	31	1	3	14	0	14	12	7	12	10	41	15	5	0	7	1	1	0	31	-31	0	0	0	0	0	0	0	0
140	19	2	1	14	1	13	15	7	10	13	45	9	0	1	9	1	0	1	13	-13	1	0	0	1	0	0	0	0
141	39	1	1	14	1	13	14	14	12	11	51	15	0	1	16	2	1	1	38	-38	1	1	1	1	1	0	0	1
142	33	2	1	14	0	14	7	9	6	8	30	0	1	0	19	2	1	1	23	-23	1	0	1	0	0	1	0	0
143	37	1	1	14	0	14	11	13	8	7	39	1	5	0	11	1	1	1	37	-37	1	1	1	0	0	1	0	0
144	21	2	1	14	0	14	10	12	5	6	33	0	0	0	9	2	0	1	14	-14	1	1	1	1	1	0	1	1
145	50	2	3	13	1	12	9	15	9	8	41	6	4	1	12	2	1	0	16	-16	1	0	1	1	1	0	0	0
146	27	2	3	13	1	12	14	11	8	5	38	8	3	1	15	2	0	0	15	-15	1	1	0	1	1	0	0	0
147	53	2	1	13	2	11	8	9	11	5	33	13	1	1	12	2	1	0	40	-40	1	0	1	1	1	0	0	1
148	25	2	1	13	1	12	14	14	12	15	55	12	4	1	10	2	0	1	23	-23	1	1	1	1	1	1	1	0
149	38	2	1	13	0	13	10	13	10	10	43	17	0	0	15	1	1	1	37	-37	1	1	1	1	0	0	0	0
150	23	2	2	13	1	12	17	13	12	13	55	5	5	1	8	1	0	1	11	-11	1	1	1	0	1	0	0	1
151	21	2	1	13	0	13	9	13	11	11	44	14	3	0	13	1	0	1	15	-15	0	0	0	0	0	0	0	0
152	35	2	1	13	1	12	10	8	6	9	33	6	2	1	9	2	1	1	12	-12	1	0	1	1	0	1	0	0
153	27	2	1	13	0	13	11	12	8	7	38	0	2	0	15	1	1	1	27	-27	1	1	1	0	0	1	0	0
154	24	1	3	12	0	12	12	10	9	8	39	17	2	0	16	1	0	1	19	-19	1	0	0	1	0	0	0	0
155	61	2	3	12	1	11	14	20	10	8	52	8	1	1	12	2	1	0	45	-45	1	0	0	1	1	0	0	0
156	50	2	3	12	1	11	8	12	4	6	30	0	0	1	9	2	1	0	50	-50	1	0	1	1	1	0	1	0
157	18	1	3	12	1	11	14	7	8	8	37	5	1	1	10	2	0	1	16	-16	0	0	0	0	0	0	0	0
158	35	2	1	12	2	10	13	16	10	9	48	10	1	1	9	2	1	1	12	-12	1	0	0	1	0	0	0	0
159	43	1	1	12	1	11	7	7	6	11	31	0	5	1	11	2	1	0	18	-18	1	1	1	0	0	1	0	0
160	18	2	2	12	0	12	12	5	4	9	30	0	4	0	9	2	0	0	10	-10	1	1	1	0	0	0	0	1
161	50	2	3	11	0	11	15	13	5	4	37	2	0	0	14	1	1	1	40	-40	1	0	0	1	0	0	0	0
162	19	2	3	11	2	9	15	13	5	10	43	8	2	1	13	1	0	1	15	-15	1	0	0	1	0	0	0	0
163	18	1	3	11	0	11	14	10	11	6	41	12	4	0	9	1	0	1	15	-15	1	0	1	0	1	1	0	0
164	38	2	1	11	0	11	7	13	10	8	38	3	0	0	13	1	1	1	38	-38	1	1	1	1	0	0	1	0
165	18	2	2	11	1	10	10	12	9	8	39	20	5	1	11	2	0	1	15	-15	1	0	1	1	0	1	0	1
166	32	1	1	11	0	11	8	7	12	6	33	0	1	0	16	2	0	1	23	-23	1	1	1	0	0	0	0	1
167	18	1	3	11	0	11	9	7	11	12	39	6	5	0	10	1	0	1	17	-17	1	0	0	1	1	1	0	0
168	55	2	3	11	0	11	12	8	5	5	30	2	5	0	19	2	1	0	49	-49	1	0	0	1	1	0	0	0
169	59	2	3	10	0	10	10	6	11	7	34	7	5	0	9	2	1	0	55	-55	1	0	0	1	1	0	0	0
170	46	2	3	10	0	10	11	12	9	6	38	17	1	0	9	1	1	1	45	-45	1	0	0	1	0	0	0	0
171	44	2	2	10	1	9	11	11	6	5	33	15	4	1	16	2	1	1	39	-39	1	1	1	0	0	0	0	0
172	23	1	2	10	1	9	9	12	5	8	34	9	3	1	17	2	1	1	16	-16	0	0	0	0	0	0	0	0
173	33	1	1	10	0	10	10	10	9	8	37	9	5	0	15	1	0	1	30	-30	1	1	1	0	1	1	0	1
174	40	1	1	10	0	10	12	11	11	7	41	0	0	0	16	1	1	1	35	-35	1	1	1	0	0	0	0	0
175	21	2	3	9	1	8	15	10	11	9	45	7	0	1	15	1	0	1	17	-17	1	1	0	1	0	0	0	1
176	26	1	1	9	1	8	5	8	5	5	23	0	0	1	9	2	0	0	26	-26	1	1	1	0	0	1	0	0
177	30	1	1	9	1	8	16	13	9	11	49	11	5	1	12	1	1	1	17	-17	1	1	1	0	0	0	0	1
178	18	2	3	9	0	9	7	7	6	8	28	0	0	0	11	2	0	1	16	-16	1	1	0	1	1	1	0	0
179	18	1	3	8	0	8	8	10	10	7	35	6	5	0	14	2	0	1	11	-11	1	0	1	1	1	0	1	1
180	34	1	3	8	0	8	9	9	10	8	36	6	2	0	15	1	1	1	34	-34	1	0	1	1	1	0	0	0
181	20	2	3	8	0	8	8	8	5	6	27	6	3	0	13	2	0	1	18	-18	1	0	0	1	0	0	0	1
182	51	1	3	8	0	8	10	12	7	5	34	0	1	0	5	2	1	1	51	-51	1	0	1	1	1	0	1	0
183	52	2	3	8	0	8	8	13	6	7	34	14	0	0	12	2	1	0	50	-50	1	0	1	1	1	0	0	0
184	58	2	3	8	0	8	11	11	6	5	33	18	1	0	12	2	1	0	58	-58	1	0	0	1	0	0	0	0
187	36	2	1	8	0	8	6	11	9	7	33	10	5	0	16	1	1	1	23	-23	1	1	1	0	1	1	0	1
188	50	2	1	8	0	8	12	11	8	4	35	7	4	0	9	1	1	1	30	-30	1	1	1	0	0	0	0	1
189	33	1	1	8	0	8	13	7	10	6	36	2	5	0	12	1	0	1	18	-18	1	1	1	0	1	1	0	1
190	28	2	1	8	0	8	9	10	7	9	35	3	2	0	12	2	0	1	18	-18	1	1	1	0	0	1	0	0
191	20	1	1	8	1	7	6	10	6	7	29	0	1	1	9	2	0	1	16	-16	1	1	1	0	1	1	0	0
192	30	1	1	8	1	7	10	12	11	8	41	9	3	1	22	2	1	1	27	-27	1	1	1	0	1	0	0	1
193	53	2	3	7	0	7	6	11	6	8	31	7	5	0	5	2	1	1	48	-48	1	0	1	1	1	0	0	0
194	24	2	3	7	0	7	10	6	9	8	33	6	0	0	12	2	0	1	18	-18	1	1	1	1	1	1	0	0
195	37	2	3	7	0	7	6	6	9	6	27	4	5	0	12	2	1	1	16	-16	1	0	0	1	1	1	0	0
196	32	1	1	7	0	7	8	10	6	7	31	9	3	0	14	2	0	1	15	-15	1	1	1	1	0	0	1	0
197	26	1	1	7	0	7	10	10	8	8	36	5	0	0	12	1	0	0	25	-25	1	0	1	0	0	1	0	1
198	64	1	2	7	0	7	10	10	8	6	36	1	1	0	13	1	1	0	30	-30	1	1	1	1	1	0	0	1
199	19	1	1	7	0	7	8	7	7	4	26	4	5	0	11	2	0	1	14	-14	1	1	1	0	0	0	0	1
200	23	2	1	7	0	7	6	8	5	6	25	2	3	0	9	2	0	0	14	-14	1	1	1	1	1	1	0	0
201	43	2	1	7	0	7	7	5	4	4	20	7	4	0	17	2	1	1	42	-42	1	1	1	0	1	1	0	1
202	58	2	3	7	0	7	6	5	4	4	19	0	0	0	10	2	1	0	57	-57	1	0	0	1	0	0	0	0
203	25	2	1	7	0	7	8	5	4	5	22	0	5	0	17	2	0	1	25	-25	1	1	1	0	0	1	0	0
204	57	1	3	6	0	6	7	5	5	4	21	10	0	0	9	2	1	0	52	-52	1	0	0	1	0	0	0	0
205	24	1	2	6	0	6	5	17	10	9	41	14	1	0	16	1	0	1	14	-14	0	0	0	0	0	0	0	0
206	25	2	3	6	0	6	11	5	4	4	23	2	2	0	15	2	1	0	23	-23	1	0	0	1	1	0	0	0
207	60	2	3	5	0	5	10	9	11	4	34	0	5	0	15	2	1	1	60	-60	1	0	0	1	1	0	0	0
208	45	2	1	6	0	6	5	5	4	4	18	0	1	0	11	2	1	1	30	-30	1	1	1	0	0	1	0	0
209	29	1	2	6	0	6	7	7	7	4	25	4	0	0	14	2	0	1	28	-28	1	1	1	0	0	0	0	1
210	30	2	2	17	0	17	5	13	6	8	32	6	0	0	12	2	1	1	26	-26	1	1	0	1	0	0	0	0
211	18	2	2	7	0	7	8	8	10	10	36	2	2	0	12	1	0	1	15	-15	0	0	0	0	0	0	0	1
212	37	2	2	15	0	15	13	12	12	11	48	13	3	0	15	1	1	0	25	-25	1	1	1	1	1	0	1	0
213	39	2	2	7	0	7	7	12	8	9	36	4	3	0	12	1	1	1	36	-36	1	0	0	1	1	0	1	1
214	24	2	1	25	2	23	19	17	16	17	69	21	5	1	15	1	0	1	24	-24	0	0	0	0	0	0	0	1
215	62	2	2	13	0	13	8	12	13	7	40	9	1	0	11	1	1	0	35	-35	1	0	1	0	0	0	0	1
216	59	2	2	12	1	11	10	12	10	7	39	6	0	1	10	2	1	0	49	-49	1	1	1	1	1	0	1	0
217	18	2	1	22	1	21	14	14	12	17	57	19	2	1	8	1	0	1	13	-13	1	1	0	1	1	0	1	1
218	18	1	2	8	0	8	8	8	9	7	32	8	5	0	9	2	0	1	13	-13	1	1	1	0	0	0	0	1
219	18	2	2	14	1	13	15	14	9	8	46	6	1	1	12	1	0	1	15	-15	1	1	1	1	1	1	1	1
220	22	2	1	19	1	18	15	15	8	11	49	11	5	1	14	1	0	1	13	-13	1	1	0	0	0	0	1	0
221	36	2	2	12	0	12	11	17	7	10	45	2	0	0	12	1	1	1	25	-25	1	0	0	1	1	0	1	0
222	33	1	1	14	3	11	16	12	10	12	50	12	5	1	9	1	0	1	18	-18	1	0	0	1	1	0	1	1
223	37	2	2	22	3	19	12	18	11	12	53	18	0	1	9	2	1	1	31	-31	1	0	1	1	1	0	1	1
224	35	2	1	25	1	24	10	15	12	18	55	21	3	1	12	2	1	0	15	-15	1	0	0	1	0	0	0	0
225	18	2	1	19	0	19	10	15	5	9	38	10	3	0	9	1	0	0	12	-12	1	0	0	1	0	0	0	0
226	36	2	1	21	1	20	15	15	13	16	59	21	0	1	12	1	0	1	36	-36	0	0	0	0	0	0	0	0
227	45	1	1	14	1	13	19	17	14	17	67	13	5	1	19	1	1	1	43	-43	1	0	1	1	1	0	1	0
228	28	2	1	16	1	15	16	14	11	10	51	15	4	1	15	1	1	1	28	-28	0	0	0	0	0	0	0	1
229	18	1	1	11	1	10	14	5	7	8	34	14	0	1	9	2	0	1	9	-9	1	1	1	1	1	1	1	1
230	18	2	1	24	3	21	15	13	15	16	59	17	0	1	8	1	0	0	12	-12	1	0	1	1	1	0	1	0
231	19	2	1	13	1	12	17	12	6	10	45	14	5	1	12	1	0	0	16	-16	1	1	1	1	1	0	1	1
232	37	2	2	20	3	17	15	18	12	12	57	21	2	1	12	1	1	1	35	-35	1	0	0	1	1	0	0	1
233	53	2	2	10	0	10	9	12	10	10	41	9	1	0	8	1	1	0	53	-53	1	1	0	1	1	0	0	0
234	21	2	2	14	2	12	12	12	13	11	48	10	3	1	15	2	0	1	14	-14	1	0	0	1	0	0	0	1
235	34	2	2	15	0	15	8	10	9	8	35	8	2	0	14	1	0	1	24	-24	1	1	1	1	1	1	1	0
236	62	1	2	6	0	6	8	9	4	8	29	1	5	0	9	2	1	0	62	-62	1	0	0	1	0	0	0	0
237	36	1	2	11	1	10	13	8	7	8	36	7	0	1	20	2	1	1	27	-27	0	0	0	0	0	0	0	0
238	28	2	1	25	3	22	15	20	14	18	67	21	5	1	11	1	0	0	13	-13	0	0	0	0	0	0	0	0
239	33	1	1	19	1	18	17	17	10	11	55	21	3	1	12	1	0	1	30	-30	0	0	0	0	0	0	0	1
240	23	2	2	20	3	17	17	9	10	16	52	16	1	1	19	1	0	0	22	-22	0	0	0	0	0	0	0	0
241	21	1	2	11	1	10	11	11	12	11	45	13	5	1	15	2	0	1	21	-21	0	0	0	0	0	0	0	1
242	15	2	1	21	1	20	17	14	14	18	63	18	3	1	8	1	0	0	12	-12	0	0	0	0	0	0	0	0
243	47	2	3	15	0	15	7	17	9	9	42	6	0	0	18	1	1	1	44	-44	1	0	0	1	0	0	0	0
244	60	2	3	7	0	7	7	10	11	6	34	1	0	0	5	2	1	0	49	-49	0	0	0	0	0	0	0	0
245	18	2	1	13	2	11	13	12	13	14	52	4	5	1	11	2	0	0	13	-13	1	0	0	1	1	0	0	0
246	18	2	1	22	1	21	17	15	8	11	51	14	5	1	12	1	0	0	18	-18	1	1	1	1	1	0	0	0
247	18	2	1	7	0	7	11	6	8	11	36	4	2	0	11	1	0	0	15	-15	0	0	0	0	0	0	0	1
248	18	2	1	19	1	18	11	17	15	17	60	15	4	1	11	2	0	0	10	-10	1	0	0	1	0	0	0	1
249	20	1	3	17	1	16	13	13	15	15	56	18	5	1	12	2	0	0	20	-20	1	0	1	1	0	0	0	1
250	33	1	1	12	0	12	10	10	4	6	30	4	0	0	11	2	1	1	32	-32	1	1	0	0	0	0	0	1
251	18	2	1	25	1	24	16	18	13	17	64	15	3	1	10	1	0	0	15	-15	1	1	1	1	1	0	0	1
252	31	1	3	19	1	18	14	15	11	14	54	18	0	1	20	1	1	1	26	-26	1	0	1	1	1	0	0	0
253	64	1	3	17	0	17	14	17	13	8	52	21	3	0	5	1	1	0	56	-56	1	0	1	1	1	0	0	0
254	26	2	3	23	1	22	18	17	13	11	59	10	0	1	19	1	0	0	17	-17	1	0	1	1	1	0	1	0
255	19	2	3	13	0	13	8	15	9	10	42	11	1	0	13	1	0	0	15	-15	0	0	0	0	0	0	0	1
256	56	2	3	9	2	7	10	14	8	10	42	2	0	1	5	2	1	0	50	-50	1	1	1	1	1	0	0	0
257	50	2	3	10	0	10	8	7	4	6	25	7	2	0	9	2	1	1	50	-50	0	0	0	0	0	0	0	0
258	25	1	1	9	2	7	17	17	11	12	57	15	4	1	12	1	0	1	20	-20	0	0	0	0	0	0	0	1
259	25	1	3	20	1	19	19	15	9	9	52	18	0	1	17	1	0	0	25	-25	1	0	1	1	1	0	0	0
260	18	2	2	9	2	7	11	8	4	8	31	5	5	1	12	2	0	0	15	-15	0	0	0	0	0	0	0	1
261	33	1	1	15	0	15	9	10	10	8	37	7	4	0	13	1	0	0	24	-24	1	1	0	0	0	0	0	1
262	18	1	3	15	1	14	12	13	11	13	49	11	1	1	11	2	0	0	15	-15	0	0	0	0	0	0	0	0
263	20	2	2	20	3	17	18	14	14	15	61	21	2	1	12	1	0	1	11	-11	1	1	1	1	1	0	0	1
264	21	2	3	20	3	17	14	7	13	13	47	17	3	1	12	1	0	1	20	-20	1	0	0	0	1	0	0	1
265	54	2	3	9	0	9	9	9	9	8	35	9	1	0	11	2	1	0	49	-49	1	0	0	1	1	0	0	0
266	22	2	3	27	3	24	16	18	13	11	58	20	3	1	11	1	0	1	21	-21	0	0	0	0	0	0	0	1
267	19	2	2	19	3	16	14	15	12	8	49	6	0	1	14	1	0	1	16	-16	1	0	1	0	1	0	1	1
268	18	1	2	20	1	19	12	13	10	11	46	12	3	1	12	2	0	1	12	-12	1	1	1	0	0	1	0	0
269	28	2	2	6	0	6	7	5	4	5	21	0	0	0	12	2	1	1	17	-17	1	1	1	1	1	0	0	0
270	20	2	2	27	3	24	13	19	12	10	54	18	5	1	11	2	0	1	20	-20	1	1	1	1	0	0	0	1
271	25	2	2	25	1	24	13	11	8	13	45	19	5	1	11	2	0	1	16	-16	1	1	1	0	0	0	0	0
272	25	2	2	20	2	18	13	6	11	12	42	21	5	1	10	2	0	0	23	-23	1	1	1	1	0	1	0	1
273	18	1	2	27	3	24	19	15	14	14	62	16	5	1	9	1	0	1	13	-13	0	0	0	0	0	0	1	0
274	21	2	2	24	1	23	14	9	7	10	40	12	1	1	15	1	0	1	15	-15	1	1	1	1	0	0	0	0
275	33	2	3	27	3	24	14	18	13	12	57	18	4	1	12	1	0	1	26	-26	0	0	0	0	0	0	0	1
277	23	2	2	27	3	24	14	16	14	14	58	19	0	1	9	1	0	1	11	-11	1	1	1	1	0	0	0	0
278	48	2	2	9	0	9	9	9	9	4	31	0	1	0	9	2	1	1	43	-43	1	1	0	1	0	0	0	0
279	20	1	2	16	0	16	14	8	9	7	38	17	5	0	12	1	0	1	19	-19	1	1	1	1	1	1	0	1
280	26	2	2	23	0	23	12	16	8	13	49	15	5	0	14	1	0	1	20	-20	1	1	1	1	1	0	0	1
281	18	2	2	21	1	20	15	12	14	7	48	10	5	1	11	1	0	1	13	-13	0	0	0	0	0	0	0	1
282	26	2	2	16	1	15	12	10	9	13	44	15	0	1	20	2	0	1	15	-15	1	0	1	1	0	0	0	1
283	18	2	2	9	3	6	13	6	10	9	38	1	4	1	12	2	0	1	13	-13	1	0	1	0	0	0		1
284	23	2	2	27	3	24	17	18	11	10	56	0	1	1	9	1	0	1	20	-20	1	1	1	0	0	0		1
285	18	1	2	15	1	14	10	8	5	5	28	0	4	1	9	2	0	0	12	-12	1	1	0	1	0	0		1
286	21	1	2	10	1	9	5	7	5	4	21	0	0	1	9	2	0	1	20	-20	1	0	1	1	0	0		1
287	21	2	2	10	0	3	10	8	7	8	33	0	4	0	10	2	0	0	18	-18	1	1	0	0	0	0		1
288	23	2	2	10	1	9	8	13	7	4	32	0	1	1	11	2	1	1	15	-15	0	1	0	0	0	0		1
289	28	2	2	10	0	5	5	6	6	4	21	0	1	0	9	2	0	1	23	-23	1	1	1	0	0	0		1
290	19	1	2	12	1	11	9	10	12	7	38	0	0	1	11	2	0	1	15	-15	1	1	0	1	0	0		1
291	19	1	2	19	1	18	12	11	9	6	38	0	4	1	11	2	0	1	16	-16	1	0	1	0	0	0		1
292	24	2	2	17	0	5	16	14	15	9	54	1	4	0	15	1	0	1	16	-16	1	0	1	1	0	0		1
293	25	1	3	15	1	14	16	8	13	9	46	1	2	1	9	1	0	0	17	-17	0	0	1	1	0	0		1
294	21	1	2	25	1	24	17	15	13	11	56	1	2	1	10	1	0	0	19	-19	1	1	1	1	0	0		1
